# Supplementary material
Source: PubMed Central journal article supplement (PMC4211974)
Supplement: NIHMS615489-supplement-Supp_TableS1.pdf [file NIHMS615489-supplement-Supp_TableS1.pdf]

Table S1. Prior reports of whole-genome SNP data for samples included in this study and the number of samples from which data had not been previously reported. Genotype data from Petersen *et al.* (2013a,b) are available at: <http://www.animalgenome.org/repository/pub/UMN2012.1130/> and <http://www.animalgenome.org/repository/pub/UMN2013.0125/>

| <b>Breed</b>                                   | <b>SNP Data Previously Reported (N)</b>            | <b>New SNP Data</b> |
|------------------------------------------------|----------------------------------------------------|---------------------|
| Belgian                                        | McCue et al 2012 (14), Petersen et al 2013a,b (16) | 11                  |
| Clydesdale                                     | Petersen et al 2013a,b                             | 0                   |
| Florida Cracker                                | Petersen et al 2013a,b                             | 0                   |
| Mangalarga                                     | Petersen et al 2013a,b                             | 0                   |
| Missouri Fox Trotter                           | na                                                 | 21                  |
| Mongolian                                      | McCue et al 2012 (20); diversity, selection (18)   | 0                   |
| Morgan                                         | Petersen et al 2013a,b                             | 0                   |
| New Forest Pony                                | Petersen et al 2013a,b                             | 0                   |
| PR Paso Fino                                   | Petersen et al 2013a,b                             | 0                   |
| Shetland                                       | Petersen et al 2013a,b                             | 0                   |
| Standardbred                                   | Petersen et al 2013a                               | 0                   |
| Tennessee Walking Horse                        | Petersen et al 2013a,b                             | 0                   |
| Thoroughbred                                   | McCue et al 2012 (13), Petersen et al 2013a,b (13) | 18                  |
| McCue et al 2012. PLoS Genetics 8:e1002451     |                                                    |                     |
| Petersen et al 2013a. PLoS One 8:e54997        |                                                    |                     |
| Petersen et al 2013b. PLoS Genetics 9:31003211 |                                                    |                     |
