# Supplementary material
Source: PubMed Central journal article supplement (PMC4211974)
Supplement: NIHMS615489-supplement-Supp_TableS2.pdf [file NIHMS615489-supplement-Supp_TableS2.pdf]

Table S2. The 100 unique haplotypes observed in the sample of 301 individuals and the number of observations of each per breed. “.” indicates the same allele as the most common haplotype (Hap1). The most common haplotype within each breed is indicated by bold type. Alleles at each locus are named according to the AB coding of the Illumina Beadchip with the exception of *MSTN* variants (intron 1 SNP (C/T) and SINE insertion is S for the presence of the SINE or N in its absence).

|            | ECA18 Position |          |          |          |          |          |          |          |          |                         |                 |          |          |          |          |          |          |          |          | Breed    |         |            |                 |                      |                     |           |        |                 |                        |               |          |              |              |                         |       |  |  |  |
|------------|----------------|----------|----------|----------|----------|----------|----------|----------|----------|-------------------------|-----------------|----------|----------|----------|----------|----------|----------|----------|----------|----------|---------|------------|-----------------|----------------------|---------------------|-----------|--------|-----------------|------------------------|---------------|----------|--------------|--------------|-------------------------|-------|--|--|--|
| Hap ID     | 66038428       | 66041018 | 66054465 | 66064660 | 66078922 | 66102331 | 66155365 | 66266872 | 66427663 | 66493737 - InAron 1 SNP | 66495327 - SINE | 66512456 | 66517782 | 66539967 | 66607647 | 66742899 | 66751439 | 66815336 | 66819091 | 66819112 | Belgian | Clydesdale | Florida Cracker | Missouri Fox Trotter | Mangalarga Paulista | Mongolian | Morgan | New Forest Pony | Puerto Rican Paso Fino | Quarter Horse | Shetland | Standardbred | Thoroughbred | Tennessee Walking Horse | Total |  |  |  |
| MSTN-Hap1  | A              | B        | A        | B        | B        | A        | A        | B        | A        | C                       | S               | B        | B        | A        | A        | B        | A        | A        | A        | A        | 0       | 0          | 2               | 2                    | 2                   | 0         | 0      | 0               | 0                      | 42            | 0        | 0            | 29           | 0                       | 77    |  |  |  |
| MSTN-Hap2  | .              | A        | B        | A        | A        | B        | B        | .        | .        | T                       | N               | .        | .        | B        | .        | .        | .        | .        | B        | .        | 0       | 0          | 0               | 0                    | 0                   | 0         | 5      | 1               | 0                      | 1             | 0        | 37           | 1            | 6                       | 51    |  |  |  |
| MSTN-Hap3  | .              | .        | B        | .        | .        | B        | B        | A        | .        | T                       | N               | .        | .        | B        | .        | .        | .        | .        | B        | B        | 3       | 1          | 0               | 9                    | 0                   | 1         | 3      | 1               | 0                      | 4             | 0        | 0            | 19           | 9                       | 50    |  |  |  |
| MSTN-Hap4  | .              | .        | .        | .        | .        | .        | .        | .        | .        | N                       | .               | .        | .        | .        | .        | .        | .        | .        | .        | .        | 10      | 5          | 5               | 2                    | 0                   | 4         | 0      | 1               | 1                      | 3             | 8        | 0            | 1            | 1                       | 41    |  |  |  |
| MSTN-Hap5  | .              | A        | B        | .        | .        | .        | .        | B        | T        | N                       | A               | A        | .        | .        | .        | .        | .        | .        | B        | .        | 0       | 0          | 0               | 6                    | 1                   | 0         | 9      | 1               | 0                      | 2             | 1        | 8            | 0            | 1                       | 29    |  |  |  |
| MSTN-Hap6  | .              | .        | .        | .        | .        | .        | .        | .        | T        | N                       | .               | .        | .        | .        | .        | .        | .        | .        | B        | .        | 15      | 10         | 0               | 1                    | 0                   | 1         | 0      | 1               | 0                      | 0             | 0        | 0            | 0            | 0                       | 28    |  |  |  |
| MSTN-Hap7  | B              | .        | .        | .        | .        | .        | A        | .        | T        | N                       | .               | .        | .        | .        | .        | .        | .        | .        | B        | .        | 18      | 0          | 1               | 1                    | 0                   | 0         | 0      | 0               | 0                      | 0             | 0        | 0            | 0            | 0                       | 20    |  |  |  |
| MSTN-Hap8  | .              | .        | .        | .        | .        | .        | A        | .        | T        | N                       | .               | .        | B        | .        | .        | .        | .        | .        | B        | .        | 1       | 15         | 0               | 1                    | 0                   | 1         | 0      | 1               | 0                      | 1             | 0        | 0            | 0            | 0                       | 20    |  |  |  |
| MSTN-Hap9  | B              | .        | .        | A        | A        | B        | B        | B        | T        | N                       | A               | A        | .        | B        | A        | B        | B        | .        | .        | .        | 0       | 0          | 0               | 1                    | 1                   | 0         | 0      | 1               | 1                      | 2             | 0        | 2            | 8            | 0                       | 16    |  |  |  |
| MSTN-Hap10 | .              | .        | .        | .        | .        | .        | .        | .        | T        | N                       | .               | .        | B        | .        | .        | .        | .        | B        | .        | .        | 0       | 0          | 0               | 1                    | 0                   | 4         | 1      | 0               | 2                      | 0             | 0        | 5            | 0            | 2                       | 15    |  |  |  |
| MSTN-Hap11 | .              | A        | B        | .        | .        | .        | A        | .        | T        | N                       | .               | .        | B        | .        | .        | .        | B        | B        | .        | .        | 0       | 0          | 0               | 0                    | 14                  | 1         | 0      | 0               | 0                      | 0             | 0        | 0            | 0            | 0                       | 15    |  |  |  |
| MSTN-Hap12 | .              | A        | B        | A        | A        | B        | B        | .        | T        | N                       | .               | .        | .        | .        | .        | .        | B        | B        | .        | .        | 0       | 0          | 0               | 0                    | 1                   | 0         | 1      | 0               | 1                      | 0             | 0        | 0            | 0            | 12                      | 15    |  |  |  |
| MSTN-Hap13 | .              | .        | .        | .        | .        | .        | A        | .        | T        | N                       | .               | .        | .        | .        | .        | .        | .        | B        | .        | .        | 0       | 0          | 0               | 1                    | 0                   | 2         | 4      | 1               | 0                      | 0             | 0        | 2            | 0            | 2                       | 12    |  |  |  |
| MSTN-Hap14 | .              | .        | B        | .        | .        | .        | .        | .        | T        | N                       | .               | .        | B        | .        | .        | .        | .        | .        | .        | .        | 2       | 0          | 0               | 0                    | 0                   | 0         | 0      | 0               | 0                      | 0             | 8        | 0            | 0            | 0                       | 10    |  |  |  |
| MSTN-Hap15 | .              | .        | B        | .        | .        | .        | .        | .        | N        | .                       | .               | .        | .        | .        | .        | .        | .        | B        | .        | .        | 0       | 0          | 1               | 6                    | 0                   | 0         | 0      | 1               | 2                      | 0             | 0        | 0            | 0            | 0                       | 10    |  |  |  |
| MSTN-Hap16 | .              | .        | B        | .        | .        | B        | B        | .        | T        | N                       | .               | .        | B        | .        | .        | .        | .        | B        | .        | .        | 0       | 0          | 0               | 1                    | 0                   | 2         | 0      | 1               | 0                      | 0             | 2        | 4            | 0            | 0                       | 10    |  |  |  |
| MSTN-Hap17 | .              | .        | B        | .        | .        | .        | .        | .        | T        | N                       | .               | .        | B        | .        | .        | .        | .        | B        | .        | .        | 0       | 0          | 0               | 0                    | 0                   | 4         | 0      | 1               | 5                      | 0             | 0        | 0            | 0            | 0                       | 10    |  |  |  |
| MSTN-Hap18 | .              | .        | B        | .        | .        | .        | A        | .        | N        | .                       | .               | .        | .        | .        | .        | .        | .        | B        | .        | .        | 0       | 0          | 0               | 0                    | 0                   | 0         | 0      | 0               | 1                      | 0             | 8        | 0            | 0            | 0                       | 9     |  |  |  |
| MSTN-Hap19 | .              | .        | .        | A        | .        | B        | A        | .        | T        | N                       | .               | .        | B        | .        | .        | .        | .        | B        | B        | .        | 0       | 0          | 0               | 3                    | 0                   | 0         | 0      | 0               | 2                      | 0             | 0        | 0            | 0            | 3                       | 8     |  |  |  |
| MSTN-Hap20 | .              | .        | B        | .        | .        | B        | B        | A        | .        | T                       | N               | .        | .        | B        | .        | .        | .        | .        | .        | .        | 0       | 0          | 0               | 1                    | 1                   | 0         | 1      | 0               | 1                      | 0             | 3        | 0            | 0            | 0                       | 7     |  |  |  |
| MSTN-Hap21 | .              | .        | .        | .        | .        | .        | .        | .        | T        | N                       | .               | .        | B        | .        | .        | .        | .        | .        | .        | .        | 1       | 0          | 0               | 0                    | 0                   | 2         | 0      | 2               | 0                      | 0             | 0        | 0            | 1            | 0                       | 6     |  |  |  |
| MSTN-Hap22 | .              | .        | B        | .        | .        | .        | .        | .        | T        | N                       | .               | .        | .        | .        | .        | .        | .        | B        | .        | .        | 2       | 0          | 0               | 2                    | 0                   | 1         | 1      | 0               | 0                      | 0             | 0        | 0            | 0            | 0                       | 6     |  |  |  |
| MSTN-Hap23 | .              | A        | B        | .        | .        | .        | .        | .        | T        | N                       | .               | .        | .        | .        | .        | .        | .        | B        | .        | .        | 0       | 0          | 2               | 0                    | 0                   | 0         | 2      | 1               | 0                      | 0             | 0        | 1            | 0            | 0                       | 6     |  |  |  |
| MSTN-Hap24 | .              | .        | .        | A        | A        | B        | B        | .        | T        | N                       | .               | .        | .        | .        | .        | .        | B        | B        | .        | .        | 0       | 0          | 0               | 0                    | 0                   | 0         | 0      | 1               | 5                      | 0             | 0        | 0            | 0            | 0                       | 6     |  |  |  |
| MSTN-Hap25 | .              | .        | .        | A        | .        | B        | .        | .        | T        | N                       | .               | .        | .        | .        | .        | .        | B        | B        | .        | .        | 0       | 0          | 0               | 0                    | 0                   | 0         | 0      | 0               | 6                      | 0             | 0        | 0            | 0            | 0                       | 6     |  |  |  |
| MSTN-Hap26 | .              | .        | B        | .        | .        | .        | A        | B        | T        | N                       | A               | A        | .        | .        | .        | .        | B        | B        | .        | .        | 2       | 2          | 0               | 0                    | 0                   | 0         | 0      | 1               | 0                      | 0             | 0        | 0            | 0            | 0                       | 5     |  |  |  |
| MSTN-Hap27 | B              | .        | .        | A        | A        | B        | B        | .        | T        | N                       | .               | .        | B        | .        | .        | .        | .        | B        | .        | .        | 0       | 5          | 0               | 0                    | 0                   | 0         | 0      | 0               | 0                      | 0             | 0        | 0            | 0            | 0                       | 5     |  |  |  |
| MSTN-Hap28 | .              | .        | B        | .        | .        | .        | .        | .        | N        | .                       | .               | .        | .        | .        | .        | .        | .        | .        | .        | .        | 0       | 0          | 2               | 0                    | 0                   | 0         | 0      | 0               | 1                      | 0             | 1        | 0            | 0            | 0                       | 4     |  |  |  |
| MSTN-Hap29 | .              | .        | .        | .        | .        | .        | A        | .        | N        | .                       | .               | .        | .        | .        | .        | .        | .        | B        | .        | .        | 0       | 0          | 0               | 1                    | 1                   | 0         | 0      | 2               | 0                      | 0             | 0        | 0            | 0            | 0                       | 4     |  |  |  |
| MSTN-Hap30 | .              | .        | .        | .        | .        | .        | .        | .        | T        | N                       | .               | .        | .        | .        | .        | .        | .        | .        | .        | .        | 0       | 0          | 0               | 0                    | 0                   | 0         | 2      | 0               | 0                      | 0             | 2        | 0            | 0            | 0                       | 4     |  |  |  |
| MSTN-Hap31 | .              | .        | .        | .        | .        | .        | A        | .        | T        | N                       | .               | .        | .        | .        | .        | .        | .        | .        | .        | .        | 0       | 0          | 1               | 0                    | 0                   | 1         | 0      | 1               | 0                      | 0             | 0        | 0            | 0            | 0                       | 3     |  |  |  |
| MSTN-Hap32 | .              | A        | B        | .        | .        | .        | .        | .        | T        | N                       | .               | .        | B        | .        | .        | .        | .        | B        | .        | .        | 0       | 0          | 0               | 0                    | 1                   | 1         | 0      | 1               | 0                      | 0             | 0        | 0            | 0            | 0                       | 3     |  |  |  |
| MSTN-Hap33 | .              | .        | .        | .        | .        | B        | A        | .        | T        | N                       | .               | .        | .        | .        | .        | .        | B        | B        | .        | .        | 0       | 0          | 0               | 0                    | 0                   | 0         | 3      | 0               | 0                      | 0             | 0        | 0            | 0            | 0                       | 3     |  |  |  |

|            |   |   |   |   |   |   |   |   |   |   |   |   |   |   |   |   |   |   |   |   |   |   |   |   |   |   |   |   |   |   |   |   |   |
|------------|---|---|---|---|---|---|---|---|---|---|---|---|---|---|---|---|---|---|---|---|---|---|---|---|---|---|---|---|---|---|---|---|---|
| MSTN-Hap34 | . | A | B | A | A | B | B | . | T | N | . | . | B | . | . | . | B | B | 0 | 0 | 0 | 0 | 0 | 0 | 3 | 0 | 0 | 0 | 0 | 0 | 0 | 0 | 3 |
| MSTN-Hap35 | . | . | B | A | A | B | B | . | T | N | . | . | . | . | . | . | B | . | 0 | 0 | 0 | 0 | 0 | 0 | 3 | 0 | 0 | 0 | 0 | 0 | 0 | 0 | 3 |
| MSTN-Hap36 | B | . | . | . | . | . | . | . | T | N | . | . | B | . | . | . | B | . | 0 | 0 | 0 | 0 | 0 | 0 | 0 | 3 | 0 | 0 | 0 | 0 | 0 | 0 | 3 |
| MSTN-Hap37 | . | A | B | A | . | . | . | A | . | T | N | . | . | . | . | . | . | . | 0 | 0 | 0 | 0 | 0 | 0 | 0 | 0 | 0 | 0 | 0 | 3 | 0 | 0 | 3 |
| MSTN-Hap38 | . | . | B | . | . | . | . | A | . | T | N | . | . | . | . | . | . | . | 0 | 2 | 0 | 0 | 0 | 0 | 0 | 0 | 0 | 0 | 0 | 0 | 0 | 0 | 2 |
| MSTN-Hap39 | . | . | B | A | . | . | . | A | . | T | N | . | . | . | . | . | . | . | 0 | 0 | 0 | 1 | 0 | 0 | 0 | 0 | 0 | 0 | 0 | 1 | 0 | 0 | 2 |
| MSTN-Hap40 | . | . | . | A | A | B | B | . | B | T | N | A | A | . | . | . | B | . | 0 | 0 | 0 | 0 | 2 | 0 | 0 | 0 | 0 | 0 | 0 | 0 | 0 | 0 | 2 |
| MSTN-Hap41 | . | . | . | . | . | B | B | A | . | T | N | . | . | B | . | . | . | . | 0 | 0 | 0 | 0 | 2 | 0 | 0 | 0 | 0 | 0 | 0 | 0 | 0 | 0 | 2 |
| MSTN-Hap42 | . | A | B | . | . | . | . | . | T | N | . | . | B | . | . | . | . | . | 0 | 0 | 0 | 0 | 0 | 2 | 0 | 0 | 0 | 0 | 0 | 0 | 0 | 0 | 2 |
| MSTN-Hap43 | . | . | B | . | A | . | B | . | . | T | N | . | . | B | . | . | . | . | 0 | 0 | 0 | 0 | 0 | 2 | 0 | 0 | 0 | 0 | 0 | 0 | 0 | 0 | 2 |
| MSTN-Hap44 | . | . | B | A | A | . | B | A | . | T | N | . | . | B | . | . | B | B | 0 | 0 | 0 | 0 | 0 | 0 | 2 | 0 | 0 | 0 | 0 | 0 | 0 | 0 | 2 |
| MSTN-Hap45 | . | . | . | . | . | . | . | A | . | T | N | . | . | B | . | . | . | . | 0 | 0 | 0 | 0 | 0 | 0 | 2 | 0 | 0 | 0 | 0 | 0 | 0 | 0 | 2 |
| MSTN-Hap46 | . | A | B | A | A | B | B | . | . | T | N | . | . | B | . | . | . | . | 0 | 0 | 0 | 0 | 0 | 0 | 1 | 1 | 0 | 0 | 0 | 0 | 0 | 0 | 2 |
| MSTN-Hap47 | B | . | . | . | . | . | . | . | . | N | . | . | . | . | . | . | . | . | 0 | 0 | 0 | 0 | 0 | 0 | 0 | 2 | 0 | 0 | 0 | 0 | 0 | 0 | 2 |
| MSTN-Hap48 | . | . | . | . | A | . | . | . | . | N | . | . | . | . | . | . | B | . | 0 | 0 | 0 | 0 | 0 | 0 | 0 | 0 | 2 | 0 | 0 | 0 | 0 | 0 | 2 |
| MSTN-Hap49 | . | . | . | . | . | . | . | A | . | . | N | . | . | . | . | . | . | . | 0 | 0 | 0 | 0 | 0 | 0 | 0 | 0 | 0 | 0 | 2 | 0 | 0 | 0 | 2 |
| MSTN-Hap50 | . | . | B | . | A | . | B | . | . | T | N | . | . | . | . | . | . | . | 0 | 0 | 0 | 0 | 0 | 0 | 0 | 0 | 0 | 0 | 0 | 2 | 0 | 0 | 2 |
| MSTN-Hap51 | . | . | . | . | . | . | . | A | B | T | N | A | A | . | . | . | B | . | 1 | 0 | 0 | 0 | 0 | 0 | 0 | 0 | 0 | 0 | 0 | 0 | 0 | 0 | 1 |
| MSTN-Hap52 | . | . | B | . | . | . | . | A | . | T | N | . | . | . | . | . | B | . | 1 | 0 | 0 | 0 | 0 | 0 | 0 | 0 | 0 | 0 | 0 | 0 | 0 | 0 | 1 |
| MSTN-Hap53 | . | A | B | A | A | B | B | . | B | T | N | A | A | . | . | . | B | . | 0 | 0 | 0 | 1 | 0 | 0 | 0 | 0 | 0 | 0 | 0 | 0 | 0 | 0 | 1 |
| MSTN-Hap54 | . | A | B | A | A | B | B | . | B | T | N | A | A | . | B | A | B | . | 0 | 0 | 0 | 1 | 0 | 0 | 0 | 0 | 0 | 0 | 0 | 0 | 0 | 0 | 1 |
| MSTN-Hap55 | . | . | B | . | . | . | . | A | . | . | N | . | . | . | . | . | B | B | 0 | 0 | 0 | 0 | 1 | 0 | 0 | 0 | 0 | 0 | 0 | 0 | 0 | 0 | 1 |
| MSTN-Hap56 | . | . | B | . | . | . | . | A | . | T | N | . | . | B | . | . | B | B | 0 | 0 | 0 | 0 | 1 | 0 | 0 | 0 | 0 | 0 | 0 | 0 | 0 | 0 | 1 |
| MSTN-Hap57 | . | A | B | A | A | . | B | A | . | . | N | . | . | . | . | . | B | B | 0 | 0 | 0 | 0 | 1 | 0 | 0 | 0 | 0 | 0 | 0 | 0 | 0 | 0 | 1 |
| MSTN-Hap58 | . | . | B | . | . | . | . | A | . | . | N | . | . | . | . | . | . | . | 0 | 0 | 0 | 0 | 1 | 0 | 0 | 0 | 0 | 0 | 0 | 0 | 0 | 0 | 1 |
| MSTN-Hap59 | B | . | . | . | . | . | . | . | T | N | . | . | B | . | . | . | . | . | 0 | 0 | 0 | 0 | 0 | 1 | 0 | 0 | 0 | 0 | 0 | 0 | 0 | 0 | 1 |
| MSTN-Hap60 | . | . | . | . | B | B | . | . | T | N | . | . | B | . | . | . | B | B | 0 | 0 | 0 | 0 | 0 | 1 | 0 | 0 | 0 | 0 | 0 | 0 | 0 | 0 | 1 |
| MSTN-Hap61 | . | A | B | . | . | . | . | A | . | T | N | . | . | . | . | . | B | . | 0 | 0 | 0 | 0 | 0 | 1 | 0 | 0 | 0 | 0 | 0 | 0 | 0 | 0 | 1 |
| MSTN-Hap62 | . | . | B | . | A | . | . | A | . | T | N | . | . | . | . | . | B | B | 0 | 0 | 0 | 0 | 0 | 1 | 0 | 0 | 0 | 0 | 0 | 0 | 0 | 0 | 1 |
| MSTN-Hap63 | . | . | . | . | . | . | . | . | T | N | . | . | . | . | . | . | B | B | 0 | 0 | 0 | 0 | 0 | 1 | 0 | 0 | 0 | 0 | 0 | 0 | 0 | 0 | 1 |
| MSTN-Hap64 | . | . | . | . | A | . | . | A | . | T | N | . | . | . | . | . | B | B | 0 | 0 | 0 | 0 | 0 | 1 | 0 | 0 | 0 | 0 | 0 | 0 | 0 | 0 | 1 |
| MSTN-Hap65 | . | . | B | A | A | B | B | . | B | T | N | A | A | . | . | . | B | . | 0 | 0 | 0 | 0 | 0 | 1 | 0 | 0 | 0 | 0 | 0 | 0 | 0 | 0 | 1 |
| MSTN-Hap66 | . | A | B | . | . | . | B | A | . | T | N | . | . | B | . | . | B | . | 0 | 0 | 0 | 0 | 0 | 1 | 0 | 0 | 0 | 0 | 0 | 0 | 0 | 0 | 1 |
| MSTN-Hap67 | . | . | B | . | . | . | B | . | . | T | N | . | . | . | . | . | . | . | 0 | 0 | 0 | 0 | 0 | 1 | 0 | 0 | 0 | 0 | 0 | 0 | 0 | 0 | 1 |
| MSTN-Hap68 | . | . | . | . | A | . | . | A | . | T | N | . | . | . | . | . | B | . | 0 | 0 | 0 | 0 | 0 | 1 | 0 | 0 | 0 | 0 | 0 | 0 | 0 | 0 | 1 |
| MSTN-Hap69 | . | . | . | . | . | . | . | . | T | N | . | . | B | . | . | . | B | B | 0 | 0 | 0 | 0 | 0 | 1 | 0 | 0 | 0 | 0 | 0 | 0 | 0 | 0 | 1 |
| MSTN-Hap70 | . | . | B | . | . | . | B | . | . | T | N | . | . | . | . | . | B | B | 0 | 0 | 0 | 0 | 0 | 0 | 1 | 0 | 0 | 0 | 0 | 0 | 0 | 0 | 1 |
| MSTN-Hap71 | . | . | . | . | . | . | . | A | . | T | N | . | . | B | . | . | B | B | 0 | 0 | 0 | 0 | 0 | 0 | 1 | 0 | 0 | 0 | 0 | 0 | 0 | 0 | 1 |
| MSTN-Hap72 | . | . | B | . | . | . | B | A | . | T | N | . | . | . | . | . | B | . | 0 | 0 | 0 | 0 | 0 | 0 | 1 | 0 | 0 | 0 | 0 | 0 | 0 | 0 | 1 |
| MSTN-Hap73 | B | . | . | . | B | B | . | . | T | N | . | . | B | . | . | . | . | . | 0 | 0 | 0 | 0 | 0 | 0 | 0 | 1 | 0 | 0 | 0 | 0 | 0 | 0 | 1 |
| MSTN-Hap74 | . | A | B | A | A | . | B | . | . | T | N | . | . | B | . | . | B | . | 0 | 0 | 0 | 0 | 0 | 0 | 0 | 1 | 0 | 0 | 0 | 0 | 0 | 0 | 1 |
| MSTN-Hap75 | B | . | . | . | . | . | . | . | T | N | . | . | B | . | . | . | B | B | 0 | 0 | 0 | 0 | 0 | 0 | 0 | 1 | 0 | 0 | 0 | 0 | 0 | 0 | 1 |
| MSTN-Hap76 | . | . | . | . | . | B | B | . | . | T | N | . | . | B | . | . | B | . | 0 | 0 | 0 | 0 | 0 | 0 | 0 | 1 | 0 | 0 | 0 | 0 | 0 | 0 | 1 |
| MSTN-Hap77 | . | . | . | . | . | . | . | . | . | N | . | . | . | . | . | . | B | . | 0 | 0 | 0 | 0 | 0 | 0 | 0 | 0 | 1 | 0 | 0 | 0 | 0 | 0 | 1 |
| MSTN-Hap78 | . | . | B | . | . | . | . | . | . | N | . | . | . | . | . | . | B | B | 0 | 0 | 0 | 0 | 0 | 0 | 0 | 0 | 1 | 0 | 0 | 0 | 0 | 0 | 1 |
| MSTN-Hap79 | . | . | B | A | A | B | B | . | . | T | N | . | . | . | . | . | B | B | 0 | 0 | 0 | 0 | 0 | 0 | 0 | 0 | 1 | 0 | 0 | 0 | 0 | 0 | 1 |
| MSTN-Hap80 | . | . | B | . | . | . | . | . | T | N | . | . | B | . | . | . | B | B | 0 | 0 | 0 | 0 | 0 | 0 | 0 | 0 | 1 | 0 | 0 | 0 | 0 | 0 | 1 |

[illegible]
